# Supplementary material
Source: PubMed Central journal article supplement (PMC4454458)
Supplement: NIHMS693655-supplement-Supplementary_Tables_1-5.pdf [file NIHMS693655-supplement-Supplementary_Tables_1-5.pdf]

## Supplemental file

**Supplemental Table 1.** List of clinical trials by ID number (source, [www.clinicaltrials.gov](http://www.clinicaltrials.gov))

|             |                                                                                                                                                                                                                |
|-------------|----------------------------------------------------------------------------------------------------------------------------------------------------------------------------------------------------------------|
| NCT00121680 | A phase I/II, multicenter, open-label, dose escalation study of E7080 in patients with advanced solid tumors and in combination with temozolomide in patients with advanced and/or recurrent melanoma          |
| NCT00215605 | Phase I dose-escalation study of the safety and pharmacokinetics of XL184 administered orally to subjects with advanced malignancies                                                                           |
| NCT00244972 | Phase I study of tipifarnib and sorafenib in patients with biopsiable advanced cancer                                                                                                                          |
| NCT00428545 | Phase I/II trial of bevacizumab and bortezomib in patients with advanced malignancies                                                                                                                          |
| NCT00429234 | Phase I open-labeled trial of gemcitabine and dasatinib in advanced solid tumors                                                                                                                               |
| NCT00454090 | Phase I, open-label, multi-center study to assess the safety, tolerability and pharmacokinetics of single and multiple oral doses of AZD8330 in patients with advanced malignancies                            |
| NCT00458731 | Phase I clinical trial evaluating the toxicity, pharmacokinetics and biological effects of intravenous bevacizumab in combination with escalating doses of oral AZD2175 in patients with advanced malignancies |
| NCT00495872 | A multi-arm complete phase I trial of valproic acid-based 2-agent oral regimens in patients with advanced solid tumor                                                                                          |
| NCT00500422 | Phase I study of a combination of doxil, velcade, and gemcitabine in advanced solid tumors                                                                                                                     |
| NCT00522652 | Phase I trial of oral PX-478 (a HIF-1 $\alpha$ inhibitor) in patients with advanced solid tumors and lymphoma                                                                                                  |
| NCT00529022 | Phase I/II trial of sequential azacitidine and valproic acid plus carboplatin in the treatment of patients with platinum resistant epithelial ovarian cancer                                                   |
| NCT00530907 | Phase I study of valproic acid given in combination with bevacizumab in patients with advanced cancer to determine safety and tolerability                                                                     |
| NCT00532090 | Multiple ascending dose study of R4733 administered orally in patients with refractory metastatic or locally advanced solid tumors                                                                             |
| NCT00543504 | Phase I study of bevacizumab in combination with 1) sunitinib, 2) sorafenib, 3) erlotinib                                                                                                                      |

|             |                                                                                                                                                                                                                                                    |
|-------------|----------------------------------------------------------------------------------------------------------------------------------------------------------------------------------------------------------------------------------------------------|
|             | cetuximab, 4) trastuzumab and lapatinib                                                                                                                                                                                                            |
| NCT00554268 | An open label phase I trial of PBI-05204 in advanced cancer patients                                                                                                                                                                               |
| NCT00559533 | A multi-center, open-label, phase I study of single agent R7112 administered on a daily schedule to patients with advanced malignancies, except all forms of leukemia                                                                              |
| NCT00610493 | Phase I trial of bevacizumab and temsirolimus in patients with advanced malignancies                                                                                                                                                               |
| NCT00679133 | Open-label dose-escalation trial to evaluate the safety, pharmacokinetics, and pharmacodynamics of oral MGCD265 administered with interruption to subjects with advanced malignancies                                                              |
| NCT00687622 | An open-label, multiple-dose, dose-escalation study to investigate the safety, pharmacokinetics, and pharmacodynamics of the MEK inhibitor GSK1120212 in patients with solid tumors or lymphoma                                                    |
| NCT00725933 | Phase I, multicenter, open-label, dose escalation, safety, pharmacokinetic, and pharmacodynamic study of BIIB028 administered to subjects with advanced solid tumors                                                                               |
| NCT00726583 | Phase I trial of oral PX-866 (a PI3K inhibitor) in patients with advanced solid tumors                                                                                                                                                             |
| NCT00731263 | Phase I/II, open-label, multi-center study to assess the safety, tolerability, pharmacokinetics, and preliminary efficacy of the tor kinase inhibitor AZD8055 administered orally to patients with advanced solid tumors.                          |
| NCT00756847 | Phase I dose-escalation study of the safety and pharmacokinetics of XL147 in combination with paclitaxel and carboplatin in subjects with solid tumors                                                                                             |
| NCT00761644 | Phase I trial of doxil, bevacizumab and temsirolimus                                                                                                                                                                                               |
| NCT00770731 | Phase I study of temsirolimus, topotecan, and bortezomib in patients with advanced malignancy                                                                                                                                                      |
| NCT00811993 | Phase Ib study to evaluate the safety of combining IGF-1R antagonist R1507 with standard chemotherapy drug treatments in patients with advanced malignancies                                                                                       |
| NCT00813384 | Phase I, first-in-human study evaluating the safety, tolerability, pharmacokinetics, and pharmacodynamics of AMG 208 in adult subjects with advanced solid tumors                                                                                  |
| NCT00861419 | An open-label, dose escalation study to evaluate the safety, tolerability, and pharmacokinetics of AMG 386 with AMG 706, AMG 386 with bevacizumab, AMG 386 with sorafenib, and AMG 386 with sunitinib in adult patients with advanced solid tumors |
| NCT00877773 | Histology-independent study of the mTor inhibitor, temsirolimus, in patients with advanced cancer                                                                                                                                                  |
| NCT00880321 | Phase I, open-label, multiple-dose, dose-escalation study to investigate the safety, pharmacokinetics, and pharmacodynamics of the BRAF inhibitor GSK2118436                                                                                       |

|             |                                                                                                                                                                                                                                                                                                   |
|-------------|---------------------------------------------------------------------------------------------------------------------------------------------------------------------------------------------------------------------------------------------------------------------------------------------------|
|             | with solid tumors                                                                                                                                                                                                                                                                                 |
| NCT00895128 | Phase I dose-escalation study of erlotinib in combination with dasatinib in subjects with advanced cancer. Companion study to umbrella protocol                                                                                                                                                   |
| NCT00895362 | Phase I dose-escalation study of erlotinib in combination with cetuximab in subjects with advanced cancer. Companion study to umbrella protocol                                                                                                                                                   |
| NCT00895687 | A Phase I dose-escalation study of erlotinib in combination with bortezomib in subjects with advanced cancer. Companion study to umbrella protocol                                                                                                                                                |
| NCT00903734 | An umbrella protocol for histology-independent, phase I modular study based on growth factor receptor mutation status: using erlotinib alone or in combination with cetuximab, bortezomib, or dasatinib to overcome resistance                                                                    |
| NCT00920257 | Phase I, open-label, two-stage study to investigate the safety, tolerability, pharmacokinetics, and pharmacodynamics of the oral AKT inhibitor GSK2141795 in subjects with solid tumors or lymphomas                                                                                              |
| NCT00940225 | A randomized discontinuation study of XL184 in subjects with advanced solid tumors                                                                                                                                                                                                                |
| NCT00940381 | Phase I trial of sirolimus and cetuximab in patients with advanced malignancies                                                                                                                                                                                                                   |
| NCT00962091 | An open-label, phase I study of the relative bioavailability, food effect, safety and pharmacokinetics of MLN8237 in patients with advanced solid tumors                                                                                                                                          |
| NCT00972686 | Phase I open-label, dose-escalation study of the phosphoinositide 3-kinase inhibitor GSK2126458 in subjects with solid tumors or lymphoma                                                                                                                                                         |
| NCT01014936 | Phase I open-label, non-randomized, dose-escalation first-in-man trial to investigate the safety and efficacy of the met kinase inhibitor EMD 1214063 under two different regimens in subjects with advanced solid tumors                                                                         |
| NCT01021072 | Phase I study of MABP1 in patients with advanced cancers                                                                                                                                                                                                                                          |
| NCT01054313 | A Phase I trial of docetaxel and sirolimus in patients with advanced malignancies                                                                                                                                                                                                                 |
| NCT01072175 | An open-label, dose-escalation, phase I study to investigate the safety, pharmacokinetics, pharmacodynamics and clinical activity of the BRAF inhibitor GSK2118436 in combination with the MEK inhibitor GSK1120212 in subjects with BRAF mutant metastatic melanoma                              |
| NCT01087554 | Phase I trial of sirolimus (mTOR inhibitor) and vorinostat (histone deacetylase inhibitor) in patients with advanced cancer                                                                                                                                                                       |
| NCT01091428 | Randomized phase 2 study of MLN8237, an aurora kinase inhibitor, plus weekly paclitaxel or weekly paclitaxel alone in patients with recurrent epithelial ovarian, endometrial, fallopian tube, or primary peritoneal cancer, preceded by a phase I portion in patients with advanced solid tumors |

|             |                                                                                                                                                                                                                                                                                                   |
|-------------|---------------------------------------------------------------------------------------------------------------------------------------------------------------------------------------------------------------------------------------------------------------------------------------------------|
|             | breast cancer                                                                                                                                                                                                                                                                                     |
| NCT01110486 | Phase I study evaluating the safety and pharmacokinetics of ABT-348 as monotherapy or in combination with carboplatin or in combination with docetaxel in subjects with advanced solid tumors                                                                                                     |
| NCT01117623 | Open label, phase I study to determine the safety, tolerability, maximum tolerated dose, pharmacokinetics, and biomarker status of BAY73-4506 in patients with advanced solid malignancies                                                                                                        |
| NCT01138085 | Phase I dose escalation open-label safety and pharmacokinetic study to determine the recommended phase II dose of GSK1120212 dosed in combination with GSK2238280 in subjects with solid tumors (part 1) and in subjects with pancreatic cancer, endometrial cancer or colorectal cancer (part 2) |
| NCT01187199 | Phase I trial of bevacizumab and temsirolimus in combination with 1) carboplatin, 2) paclitaxel, 3) sorafenib for the treatment of advanced cancer                                                                                                                                                |
| NCT01197170 | Hormone receptor positive disease across solid tumor types: A phase I study of endocrine agent hormone blockade and combination approaches with targeted agents to promote synergy and overcome resistance                                                                                        |
| NCT00841191 | Phase I/II, multiple-dose, dose-escalation study to assess the safety, efficacy, and pharmacokinetics of intravenous CNTO 328, an anti-interleukin 6 (IL-6) monoclonal antibody, in subjects with solid tumors                                                                                    |

**Supplemental Table 2. Distribution of Molecular Aberrations by Diagnosis**

|           | Breast |    | CRC    |    | GI-Other |    | Renal |    | GU Other |    | Ovarian |    | Endome |
|-----------|--------|----|--------|----|----------|----|-------|----|----------|----|---------|----|--------|
|           |        | %  |        | %  |          | %  |       | %  |          | %  |         | %  |        |
| PIK-3CA   | 13/47  | 28 | 23/159 | 14 | 4/34     | 12 | 1/8   | 12 | 1/36     | 3  | 7/81    | 9  | 11/48  |
| BRAF      | 0/24   | 0  | 17/163 | 10 | 0/25     | 0  | 0/2   | 0  | 0/25     | 0  | 2/63    | 3  | 0/31   |
| KRAS      | 1/32   | 3  | 82/201 | 41 | 3/30     | 10 | 0/3   | 0  | 1/26     | 4  | 4/67    | 6  | 4/33   |
| NRAS      | 0/16   | 0  | 4/77   | 5  | 2/16     | 12 | 0/1   | 0  | 0/17     | 0  | 0/43    | 0  | 0/24   |
| EGFR      | 1/40   | 2  | 0/115  | 0  | 1/31     | 3  | 0/3   | 0  | 0/22     | 0  | 1/63    | 2  | 0/23   |
| CKIT      | 0/16   | 0  | 1/67   | 1  | 1/19     | 5  | 0/1   | 0  | 1/18     | 6  | 1/31    | 3  | 0/19   |
| PTEN Loss | 2/24   | 8  | 12/80  | 15 | 3/19     | 16 | 0/6   | 0  | 8/23     | 35 | 5/37    | 14 | 6/16   |
| RET       | 0/0    | 0  | 0/2    | 0  | 0/0      | 0  | 0/0   | 0  | 0/1      | 0  | 0/2     | 0  | 0/2    |
| p53       | 3/8    | 38 | 10/22  | 45 | 1/3      | 33 | 1/4   | 25 | 2/7      | 29 | 4/10    | 40 | 4/5    |

Abbreviations: CRC—Colorectal Cancer, GI—Gastrointestinal, GU—Genitourinary, GYN—Gynecological

**Supplemental Table 3. Distribution of Molecular Aberrations by Diagnosis**

|              | H & N |    | Lung  |    | Melanoma |    | Pancreatic |    | Sarcoma |    | Thyroid |
|--------------|-------|----|-------|----|----------|----|------------|----|---------|----|---------|
|              | %     |    | %     |    | %        |    | %          |    | %       |    |         |
| PIK-3CA      | 6/63  | 10 | 5/47  | 11 | 2/63     | 3  | 1/22       | 5  | 0/29    | 0  | 1/31    |
| BRAF         | 1/55  | 2  | 0/26  | 0  | 77/133   | 58 | 0/18       | 0  | 0/25    | 0  | 17/49   |
| KRAS         | 3/24  | 12 | 16/71 | 23 | 1/47     | 2  | 12/22      | 55 | 0/23    | 0  | 1/19    |
| NRAS         | 0/39  | 0  | 0/23  | 0  | 25/104   | 24 | 0/15       | 0  | 0/19    | 0  | 4/19    |
| EGFR         | 2/55  | 4  | 11/64 | 17 | 1/39     | 3  | 0/23       | 0  | 0/19    | 0  | 0/25    |
| CKIT         | 0/38  | 0  | 0/20  | 0  | 2/88     | 2  | 0/10       | 0  | 0/22    | 0  | 1/19    |
| PTEN<br>Loss | 8/35  | 23 | 6/34  | 18 | 7/37     | 19 | 1/8        | 12 | 2/17    | 12 | 1/20    |
| RET          | 0/0   | 0  | 0/1   | 0  | 0/0      | 0  | 0/2        | 0  | 0/1     | 0  | 16/18   |
| p53          | 1/6   | 17 | 4/11  | 36 | 4/11     | 36 | 2/6        | 33 | 2/7     | 29 | 1/4     |

Abbreviation: H & N – Head and Neck

**Supplemental Table 4.** Patient characteristics: tumor types by type of therapy

| <b>Tumor type</b>       | N=291   | Matched targeted | Unmatched |
|-------------------------|---------|------------------|-----------|
|                         |         | therapy          | therapy   |
|                         | N (%)   | N (%)            | N (%)     |
| Melanoma                | 73 (25) | 52 (30)          | 21 (18)   |
| Colorectal              | 62 (21) | 19 (11)          | 43 (37)   |
| Thyroid                 | 34 (12) | 31 (18)          | 3 (3)     |
| Other                   | 23 (8)  | 9 (5)            | 14 (12)   |
| Lung                    | 22 (8)  | 19 (11)          | 3 (3)     |
| Breast                  | 16 (6)  | 14 (8)           | 2 (2)     |
| Ovarian                 | 12 (4)  | 5 (3)            | 7 (6)     |
| Genitourinary, other    | 10 (3)  | 5 (3)            | 5 (4)     |
| Endometrial             | 9 (3)   | 7 (4)            | 2 (2)     |
| Gastrointestinal, other | 8 (3)   | 3 (2)            | 5 (4)     |
| Pancreatic              | 8 (3)   | 1 (1)            | 7 (6)     |
| Gynecological           | 7 (2)   | 5 (3)            | 2 (2)     |
| Head and neck           | 7 (2)   | 5 (3)            | 2 (2)     |

**Supplemental Table 5****Response in patients with a RET mutation and in patients with a mutation other than RET by type of therapy (non-randomized)**

| <u>1 aberration</u> | Type of therapy | No. of treated pts. | CR/PR (%) | P      |
|---------------------|-----------------|---------------------|-----------|--------|
| <u>RET</u>          | Matched         | 17                  | 7 (41)    | NA     |
|                     | Non-matched     | 0                   | NA        |        |
| <u>Non-RET</u>      | Matched         | 158                 | 40 (25)   | <.0001 |
|                     | Non-matched     | 116                 | 6 (5)     |        |

**Response in patients with PTEN loss and in patients with one aberration other than PTEN loss by type of therapy (non-randomized)**

| <u>1 aberration</u>  | Type of therapy | No. of treated pts. | CR/PR (%) | P      |
|----------------------|-----------------|---------------------|-----------|--------|
| <u>PTEN-Loss</u>     | Matched         | 24                  | 6 (25)    | .99    |
|                      | Non-matched     | 10                  | 2 (20)    |        |
| <u>Non PTEN-Loss</u> | Matched         | 151                 | 41 (27)   | <.0001 |
|                      | Non-matched     | 106                 | 4 (4)     |        |

**Response in patients with a PIK3CA aberration and in patients with one aberration other than PIK3CA by type of therapy (non-randomized)**

| <u>1 aberration</u> | Type of therapy | No. of treated pts. | CR/PR (%) | P      |
|---------------------|-----------------|---------------------|-----------|--------|
| <u>PIK3CA</u>       | Matched         | 27                  | 4 (15)    | .55    |
|                     | Non-matched     | 8                   | 0 (0)     |        |
| <u>Non-PIK3CA</u>   | Matched         | 148                 | 43 (29)   | <.0001 |
|                     | Non-matched     | 108                 | 6 (6)     |        |

**Response in patients with a KRAS aberration and in patients with one aberration other than KRAS by type of therapy (non-randomized)**

| <u>1 aberration</u> | Type of therapy | No. of treated pts. | CR/PR (%) | P     |
|---------------------|-----------------|---------------------|-----------|-------|
| <u>KRAS</u>         | Matched         | 17                  | 1 (6)     | .26   |
|                     | Non-matched     | 48                  | 0 (0)     |       |
| <u>Non-KRAS</u>     | Matched         | 158                 | 46 (29)   | .0016 |
|                     | Non-matched     | 68                  | 6 (9)     |       |
